# Supplementary material for: Preparation and application of alkali-activated cementitious materials in solidification/stabilization of chromite ore processing residue
Source: Royal Society of Chemistry journal article supplement (doi:10.1039/d4ra01270d), 2024-01-01
Supplement: d4ra01270d1.pdf [file d4ra01270d1.pdf]

## Supplementary Material

### Preparation and application of alkali-activated cementitious materials in solidification/stabilization of chromite ore processing residue

Pengyue Su <sup>a,†</sup>, Pan Zhao <sup>a,†</sup>, Hao Wang <sup>a</sup>, Kun Zhou <sup>a</sup>, Yicheng Guo <sup>a</sup>, Sha Liu <sup>a</sup>,  
Huicheng Lu <sup>a</sup>, Haiyu Chen <sup>a</sup>, Lanjun Zhang <sup>a</sup>, Ziqiang He <sup>e</sup>, Ming Xia <sup>a, b, c\*</sup>, Shujie  
Zhao <sup>d\*</sup>

<sup>a</sup> School of Environmental and Chemical Engineering, Jiangsu Ocean University,  
Lianyungang, 222005, China

<sup>b</sup> Jiangsu Institute of Marine Resources Development, Jiangsu Ocean University,  
Lianyungang, 222005, China

<sup>c</sup> Jiangsu Key Laboratory of Function Control Technology for Advanced Materials,  
Jiangsu Ocean University, Lianyungang, 222005, China

<sup>d</sup> School of Safety Science and Engineering, Anhui University of Science and  
Technology, Huainan, 232001, China

<sup>e</sup> Key Laboratory of Electromechanical Equipment Security in Western Complex  
Environment for State Market Regulation, Chongqing Special Equipment Inspection  
and Research Institute, Chongqing, 401121, China

<sup>†</sup> These authors contributed equally to the work.

\*E-mail: [xiaming@jou.edu.cn](mailto:xiaming@jou.edu.cn) (M. Xia); [zsj9506@163.com](mailto:zsj9506@163.com) (SJ. Zhao)

## **Contents**

**Table S1.** The composition of BFA, FA and COPR.

**Fig. S1.** The XPS spectra of COPR.

**Table S2.** The composition of COPR solidified body.

**Table S3.** The leaching concentrations of Cr in COPR.

**Table S1**

The composition of BFA, FA and COPR.

| Materials | CaO   | SiO <sub>2</sub> | Al <sub>2</sub> O <sub>3</sub> | MgO   | SO <sub>3</sub>                | TiO <sub>2</sub> | Na <sub>2</sub> O             | Fe <sub>2</sub> O <sub>3</sub> |
|-----------|-------|------------------|--------------------------------|-------|--------------------------------|------------------|-------------------------------|--------------------------------|
| BFS       | 36.69 | 29.75            | 15.93                          | 9.94  | 3.35                           | 1.37             | 0.79                          | 0.63                           |
| FA        | 4.98  | 47.94            | 29.75                          | 0.87  | 0.95                           | 1.57             | 1.27                          | 8.94                           |
| COPR      | 0.10  | 1.91             | 14.88                          | 10.55 | -                              | 1.45             | 6.21                          | 52.92                          |
| Materials | MnO   | K <sub>2</sub> O | P <sub>2</sub> O <sub>5</sub>  | ZnO   | Cr <sub>2</sub> O <sub>3</sub> | NiO              | V <sub>2</sub> O <sub>5</sub> | Other                          |
| BFS       | 0.63  | 0.45             | -                              | -     | -                              | -                | -                             | 0.47                           |
| FA        | -     | 2.61             | 0.26                           | 0.21  | 0.03                           | -                | 0.07                          | 0.55                           |
| COPR      | 0.47  | -                | -                              | 0.28  | 10.53                          | 0.33             | 0.23                          | 0.14                           |

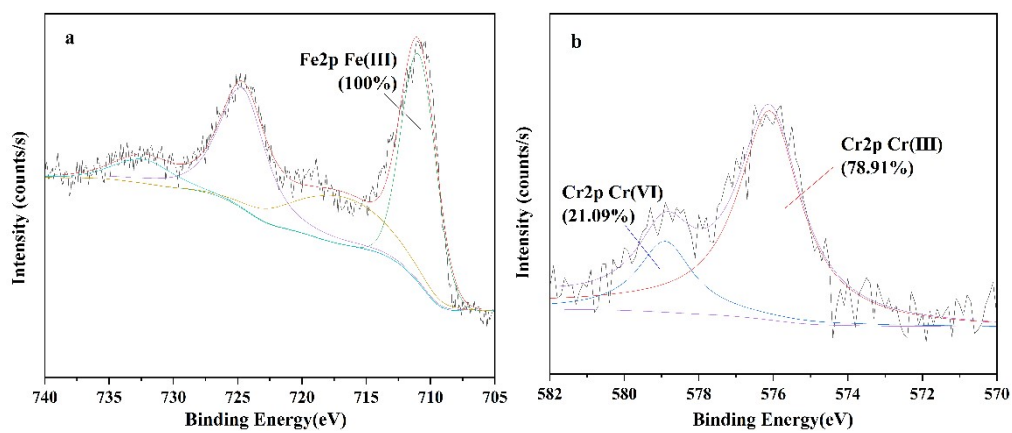

**Fig. S1.** The XPS spectra of COPR: (a) Fe 2p for COPR; (b) Cr 2p for COPR.

**Table S2**

The composition of COPR solidified body.

| Samples | COPR/g | BFS/g | FA/g | Alkali-solid content/g |
|---------|--------|-------|------|------------------------|
| W0      | 0      | 87.4  | 4.6  | 8                      |
| W10     | 10     | 78.7  | 4.1  | 7.2                    |
| W20     | 20     | 69.9  | 3.7  | 6.4                    |
| W30     | 30     | 61.2  | 3.2  | 5.6                    |
| W40     | 40     | 52.4  | 2.8  | 4.8                    |
| W50     | 50     | 43.7  | 2.3  | 4                      |
| W60     | 60     | 35.0  | 1.8  | 3.2                    |

**Table S3**

The leaching concentrations of Cr in COPR.

| Leaching method | Test type         | Samples |      |      |      |      |      |      |
|-----------------|-------------------|---------|------|------|------|------|------|------|
|                 |                   | COPR    | W10  | W20  | W30  | W40  | W50  | W60  |
| SNAM            | Cr(VI)/ (µg/mL)   | 67.39   | 0.27 | 0.55 | 0.94 | 1.62 | 2.95 | 5.44 |
|                 | Total Cr/ (µg/mL) | 81.24   | 0.55 | 0.93 | 1.69 | 2.50 | 4.40 | 7.63 |
| TCLP            | Cr(VI)/ (µg/mL)   | 32.41   | 0.07 | 0.11 | 0.32 | 0.38 | 0.59 | 1.8  |
|                 | Total Cr/ (µg/mL) | 49.21   | 0.18 | 0.25 | 0.41 | 0.45 | 0.68 | 1.90 |
